# Supplementary material for: Culture-Independent Detection and Identification of Leptospira Serovars
Source: PubMed Central journal article supplement (PMC9769591; doi:10.1128/spectrum.02475-22), 2022-11-29
Supplement: spectrum.02475-22-s0001.pdf [file spectrum.02475-22-s0001.pdf]

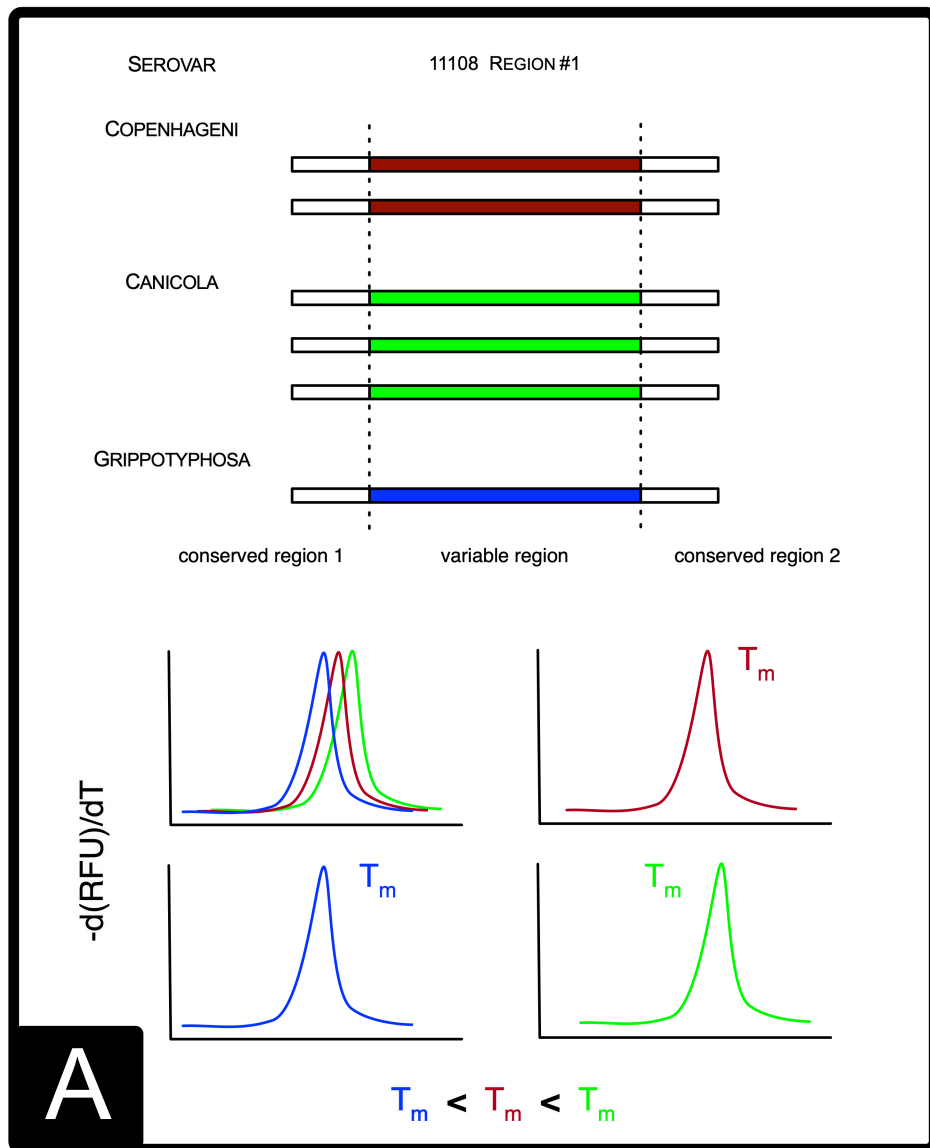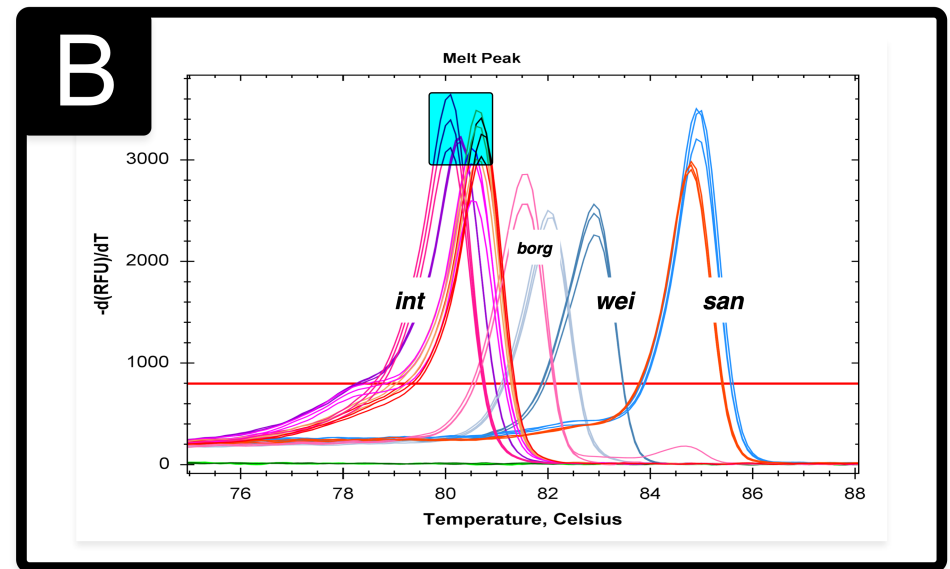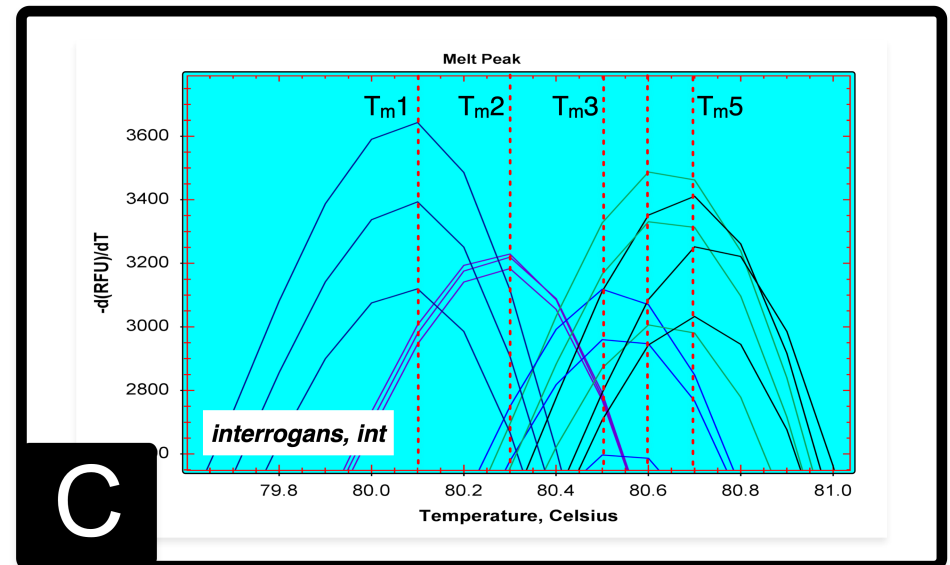

**Figure S1: Assay Design and Validation.** [A] Schematic illustrating 11108 assay design and anticipated outcomes. TOP: Forward and reverse primers were designed to target conserved regions (white) flanking variable regions with each color representing a hypothetical sequence variant. BOTTOM: Anticipated melt-curves from sequence variants depicted. [B] CFX96-generated melt-curves showing that melt peaks derived from individual strains belonging to the same species cluster together. *L. interrogans*, (*int*, 5 peaks enclosed in box and magnified in panel C), *L. borgpetersenii* (*borg*, 2), *L. weilii* (*wei*, 1) and *L. santarosai* (*san*, 2). Amplifications were done using degenerate primer pairs in triplicate and were repeated at least three times to assess reproducibility. [C] Melt peaks produced by five *L. interrogans* reference serovars. Serovar Icterohaemorrhagiae, svLai, svMankarso, svBratislava and svGrippyphosa (left to right).

**Table S1.** *Leptospira* Reference Strains

| Strain Information: Species Serogroup <i>sv</i> Serovar Strain                               | Source     |
|----------------------------------------------------------------------------------------------|------------|
| <i>L. interrogans</i> <b>Grippotyphosa</b> <i>sv</i> Grippotyphosa                           | *          |
| <i>L. interrogans</i> <b>Icterohaemorrhagiae</b> <i>sv</i> Copenhageni <i>Fiocruz L1-130</i> | **         |
| <i>L. interrogans</i> <b>Icterohaemorrhagiae</b> <i>sv</i> Icterohaemorrhagiae <i>RGA</i>    | *          |
| <i>L. interrogans</i> <b>Icterohaemorrhagiae</b> <i>sv</i> Lai 56601                         | *          |
| <i>L. interrogans</i> <b>Bataviae</b> <i>sv</i> Bataviae <i>Van Tienen</i>                   | *          |
| <i>L. interrogans</i> <b>Autumnalis</b> <i>sv</i> Autumnalis <i>Akiyami A</i>                | *          |
| <i>L. interrogans</i> <b>Australis</b> <i>sv</i> Bratislava <i>Jez-Bratislava</i>            | *          |
| <i>L. interrogans</i> <b>Australis</b> <i>sv</i> Australis <i>Ballico</i>                    | *          |
| <i>L. interrogans</i> <b>Sejroe</b> <i>sv</i> Wolffi 3705                                    | *          |
| <i>L. interrogans</i> <b>Pomona</b> <i>sv</i> Pomona                                         | *          |
| <i>L. interrogans</i> <b>Pyrogenes</b> <i>sv</i> Pyrogenes <i>Salinem</i>                    | *          |
| <i>L. interrogans</i> <b>Djasiman</b> <i>sv</i> Djasiman                                     | *          |
| <i>L. interrogans</i> <b>Mankarso</b> <i>sv</i> Mankarso                                     | *          |
| <i>L. interrogans</i> <b>Canicola</b> <i>sv</i> Canicola <i>Ruebush</i>                      | *          |
| <i>L. interrogans</i> <b>Sejroe</b> <i>sv</i> Hardjo <i>Hardjoprajitno</i>                   | ***        |
| <i>L. kirschneri</i> <b>Cynopteri</b> <i>sv</i> Cynopteri 3522                               | *          |
| <i>L. borgpetersenii</i> <b>Ballum</b> <i>sv</i> Ballum <i>MUS 127</i>                       | *          |
| <i>L. borgpetersenii</i> <b>Javanica</b> <i>sv</i> Javanica <i>Veldrat Bataviae 46</i>       | *          |
| <i>L. borgpetersenii</i> <b>Sejroe</b> <i>sv</i> Hardjo <i>Hardjobovis</i>                   | ***        |
| <i>L. borgpetersenii</i> <b>Tarrasovi</b> <i>sv</i> Tarrasovi <i>Perepelisin</i>             | *          |
| <i>L. weilii</i> <b>Celledoni</b> <i>sv</i> Celledoni                                        | *          |
| <i>L. santarosai</i> <b>Shermani</b> <i>sv</i> Shermani <i>LT 821</i>                        | ATCC 43286 |
| <i>L. santarosai</i> <b>Pyrogenes</b> <i>sv</i> Alexi <i>HS 616</i>                          | *          |
| <i>L. santarosai</i> <b>Mini</b> <i>sv</i> Georgia <i>LT 117</i>                             | *          |
| <i>L. santarosai</i> <b>Hebdomadis</b> <i>sv</i> Borincana <i>HS 622</i>                     | *          |
| <i>L. licerasiae</i> <b>Varillal</b> <i>sv</i> Varillal <i>VAR10</i>                         | NR-19925   |
| <i>L. wolffii</i> <b>Undetermined</b> <i>sv</i> Korat <i>Korat H2T</i>                       | NR-22250   |

\*Strain acquired from Renee Galloway, Centers for Disease Control and Prevention

\*\*Strain provided as a kind gift from Dr. David Haake, University of California, Los Angeles

\*\*\*Strain acquired from the USDA

**Table S2. *Leptospira* strains isolated over a five-year period (2002 – 2007) from humans, domesticated and wild animals, and peri-domiciliary rats in Iquitos, Peru.**

| <b>Strain</b> | <b>Location</b> | <b>Isolated</b> | <b>Source</b> |
|---------------|-----------------|-----------------|---------------|
| CEH029        | Belen           | Dec-02          | Rat           |
| CEH038        | Belen           | Dec-02          | Rat           |
| CEH040        | Belen           | Dec-02          | Rat           |
| CEH242        | Punchana        | Feb-03          | Rat           |
| CEH243        | Punchana        | Feb-03          | Rat           |
| CEH246        | Punchana        | Feb-03          | Rat           |
| VAR033        | Varillal        | Mar-03          | Human         |
| BEL033        | Belen           | Jun-03          | Human         |
| HAI024        | Hospital        | May-03          | Human         |
| HAI056        | Hospital        | Jun-03          | Human         |
| MOR069        | Moralillo       | Jul-03          | Human         |
| BEL039        | Belen           | Aug-03          | Human         |
| BEL050        | Belen           | Oct-03          | Human         |
| HAI156        | Hospital        | Oct-03          | Human         |
| HAI257        | Hospital        | Nov-03          | Human         |
| VAR132U       | Varillal        | Nov-03          | Human         |
| PAD451        | Padre.Cocha     | Feb-04          | Human         |
| CBC247        | Abattoir        | May-04          | Pig           |
| CBC462        | Abattoir        | May-04          | Cow           |
| CBC297        | Abattoir        | Jun-04          | Pig           |
| CBC523        | Abattoir        | Jun-04          | Cow           |

| <b>Strain</b>  | <b>Location</b> | <b>Isolated</b> | <b>Source</b> |
|----------------|-----------------|-----------------|---------------|
| MOR165         | Moralillo       | May-04          | Human         |
| MOR176BU       | Moralillo       | Jun-04          | Human         |
| CBC552         | Abattoir        | Jun-04          | Cow           |
| MMD1493        | Unknown         | 2003            | Bat           |
| CBC613         | Abattoir        | Jun-04          | Buffalo       |
| CBC1203R       | Abattoir        | Jul-04          | Pig           |
| CBC621         | Abattoir        | Aug-04          | Buffalo       |
| CBC1485        | Abattoir        | Aug-04          | Cow           |
| HAI134         | Hospital        | Aug-03          | Human         |
| HAI135         | Hospital        | Aug-03          | Human         |
| HAI308         | Hospital        | Jan-04          | Human         |
| HAI645         | Hospital        | Oct-04          | Human         |
| HAI725         | Hospital        | Dec-04          | Human         |
| MMD4803        | Palo.Seco       | Aug-05          | Possum        |
| HAI1029        | Hospital        | Feb-06          | Human         |
| <i>HAI1354</i> | Hospital        | Jan-07          | Human         |
| HAI1366        | Hospital        | Feb-07          | Human         |
| HAI1378        | Hospital        | Feb-07          | Human         |
| HAI1379        | Hospital        | Feb-07          | Human         |
| HAI1379U       | Hospital        | Mar-07          | Human         |
| HAI1378U       | Hospital        | Apr-07          | Human         |
| HAI1536        | Hospital        | Jun-07          | Human         |
| ZUN142         | Zungarococha    | Aug-04          | Human         |
| ZUN179         | Zungarococha    | Dec-04          | Human         |

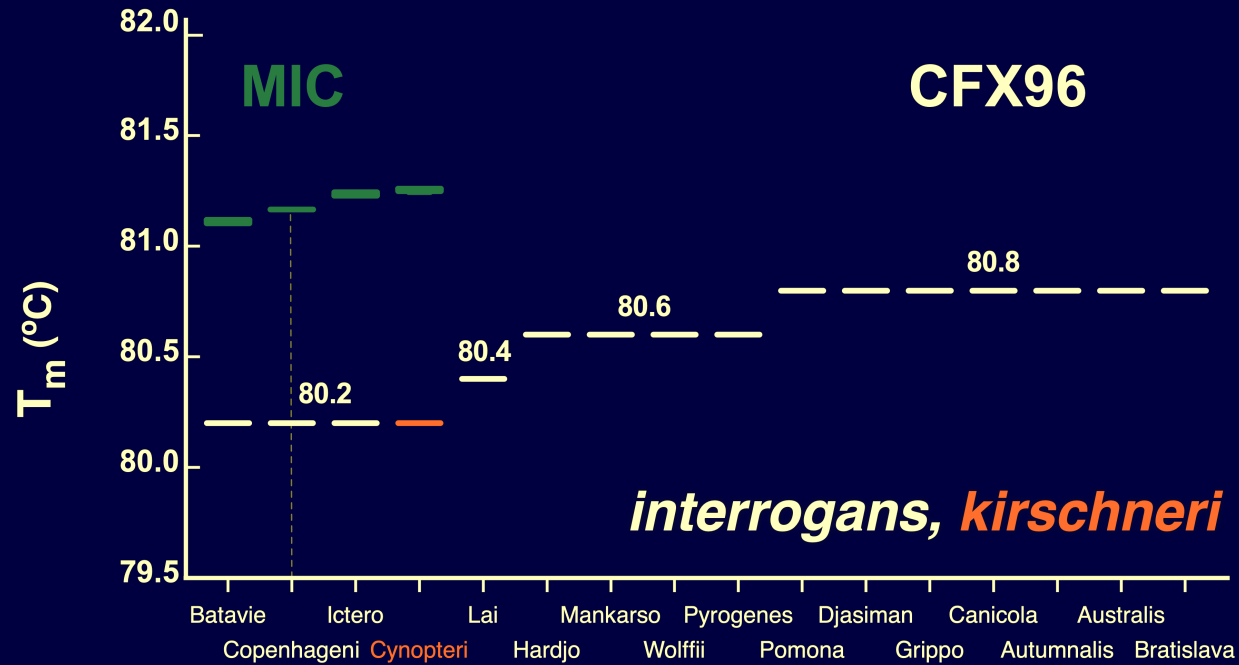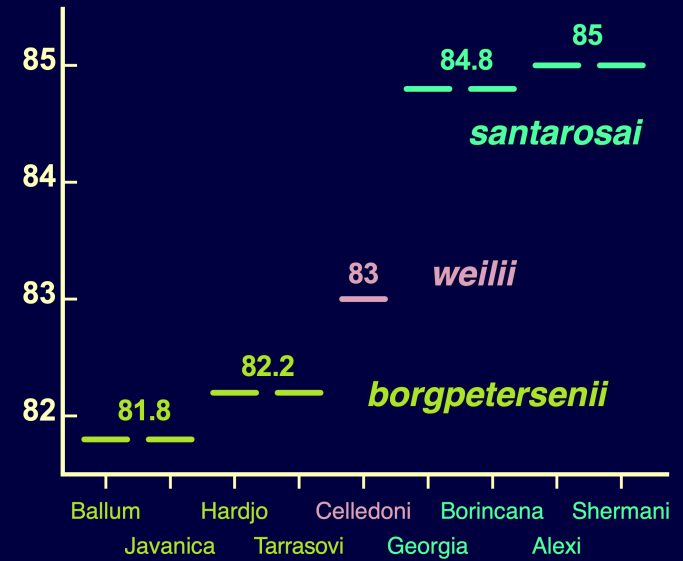

**Figure S2: Box-and-whisker plots showing the mean  $T_m$  of select *Leptospira* reference strains and serovars.** Data were produced from three technical replicates and three independent runs. LEFT: *L. interrogans* (15) and *L. kirschneri* (1) strains produced mean  $T_m$ 's ranging from 80 – 81.5°C. Four strains (i.e., serovar Bataviae, svCopenhageni, svIcterohaemorrhagiae and svCynopteri) that produced a  $T_m$  of 80.2°C on the CFX96 were re-amplified by MIC platform (overlaid in green).  $T_m$  measurements were taken at increments of 0.025°C. Each serovar could be resolved from all others in the group based upon comparison of their mean  $T_m$  by two-tailed, nonparametric t-test ( $p < 0.05$ , GraphPad Prism ver. 7.0a). RIGHT: *L. borgpetersenii* (4), *L. weilii* (1), and *L. santarosai* (4) strains produced a mean  $T_m$  between 81.5 – 85.5°C.

**Table S3.** *Leptospira* strains isolated over a fifty six years (1964-2019) period from humans in Sri Lanka. Relevant serotyping info is indicated, so too are clinical presentation. Reference strains in bold. New alleles: AG14[*interrogans* ], AG15[*kirschneri* ] and GCG2[*weillii* ]. LIV = liver involvement. KID = kidney involvement. N/A = Not Available.

| Date             | Location           | Serovar/Strain        | Species               | Serogroup                  | cg MLST | Clonal Group | Allele | Clinical Presentation/<br>Outcomes**          | Mean Tm | SD   |
|------------------|--------------------|-----------------------|-----------------------|----------------------------|---------|--------------|--------|-----------------------------------------------|---------|------|
| <b>1965-1966</b> | N/A                | <b>WEERASINGHE 6L</b> | <i>interrogans</i>    | <b>Autumnalis</b>          | N/A     | N/A          | AG3*   | N/A                                           | N/A     | N/A  |
| 15/01/2018       | Nelubawa           | FMAS_AP1              | <i>interrogans</i>    | <b>Autumnalis</b>          | 562     | 266          | AG3    | LIV, KID                                      | 80      | 0.00 |
| 15/01/2018       | Pahalagiribawa     | FMAS_AP5              | <i>interrogans</i>    | <b>Pyrogenes</b>           | 565     | 10           | AG10   | LIV                                           | 79.8    | 0.00 |
| 16/02/2018       | Kahatagasdigiya    | FMAS_AP6              | <i>interrogans</i>    | <b>Pyrogenes</b>           | 785     | 321          | AG10   | LIV, KID,<br>Thrombocytopenia                 | 80      | 0.00 |
| 6/3/2018         | Thalawa            | FMAS_AP7              | <i>interrogans</i>    | <b>Autumnalis</b>          | 786     | 266          | AG3    | LIV, KID                                      | 79.8    | 0.00 |
| 23/10/2017       | Ilukowita          | FMAS_AW1              | <i>interrogans</i>    | <b>Autumnalis</b>          | 555     | 74           | AG3    | N/A                                           | 79.8    | 0.00 |
| 22/12/2017       | Kosgama            | FMAS_AW2              | <i>interrogans</i>    | <b>Autumnalis</b>          | 567     | 269          | AG3    | LIV                                           | 79.8    | 0.00 |
| 23/12/2017       | Awissawella        | FMAS_AW3              | <i>interrogans</i>    | <b>Pyrogenes</b>           | 557     | 9            | AG10   | N/A                                           | 79.9    | 0.12 |
| 15/01/2018       | <b>Kegalle</b>     | FMAS_KG1              | <i>interrogans</i>    | <b>Bataviae</b>            | 560     | 265          | AG14   | LIV                                           | 80      | 0.00 |
| 15/01/2018       | <b>Kegalle</b>     | FMAS_KG2              | <i>interrogans</i>    | <b>Pyrogenes</b>           | 561     | 263          | AG3    | N/A                                           | 79.8    | 0.00 |
| 19/10/2017       | Kithulgala         | FMAS_KW1              | <i>interrogans</i>    | <b>Djasiman</b>            | 784     | 10           | AG3    | Hypotension,<br>Thrombocytopenia, LIV,<br>KID | 79.9    | 0.12 |
| 23/10/2017       | Bulathkohupitiya   | FMAS_KW2              | <i>interrogans</i>    | <b>Autumnalis</b>          | 631     | 291          | AG3    | Hypotension, LIV                              | 79.8    | 0.00 |
| 29/12/2017       | Kadugannawa        | FMAS_PD1              | <i>interrogans</i>    | <b>Pyrogenes</b>           | 558     | 263          | AG3    | LIV                                           | 79.7    | 0.12 |
| 17/08/2018       | Rotawewa           | FMAS_PN2              | <i>interrogans</i>    | <b>Icterohaemorrhagiae</b> | 788     | 322          | AG14   | LIV                                           | 80      | 0.00 |
| 19/11/2018       | Maho               | FMAS_PN3              | <i>interrogans</i>    | <b>Autumnalis</b>          | 789     | 266          | AG3    | LIV                                           | 79.9    | 0.12 |
| 23/12/2017       | Ihalaniriella      | FMAS_RT2              | <i>interrogans</i>    | <b>Autumnalis</b>          | 569     | 271          | AG3    | N/A                                           | 79.8    | 0.00 |
| <b>1965-1966</b> | <b>Ratnapura</b>   | <b>RATNAPURA CDC</b>  | <i>kirschneri</i>     | <b>Grippotyphosa</b>       | N/A     | N/A          | AG13*  | N/A                                           | N/A     | N/A  |
| <b>1965</b>      | N/A                | <b>GEYAWEERA CDC</b>  | <i>interrogans</i>    | <b>Sejroe</b>              | N/A     | N/A          | AG3    | N/A                                           | N/A     | N/A  |
| 14/01/2019       | Aralaganwila       | FMAS_PN5              | <i>kirschneri</i>     | <b>Grippotyphosa</b>       | 793     | 323          | AG15   | N/A                                           | 79.9    | 0.12 |
| <b>1964</b>      | <b>Colombo</b>     | <b>CEYLONICA CDC</b>  | <i>borgpetersenii</i> | <b>Javanica</b>            | N/A     | N/A          | GTG3*  | N/A                                           | N/A     | N/A  |
| 5/1/2018         | Kawarakkulama      | FMAS_AP2              | <i>borgpetersenii</i> | <b>Louisiana</b>           | 563     | 267          | GTG3   | LIV                                           | 80.8    | 0.00 |
| 5/1/2018         | Medawachchiya      | FMAS_AP3              | <i>borgpetersenii</i> | No agglutination           | 575     | 267          | GTG3   | N/A                                           | 80.6    | 0.00 |
| 16/02/2018       | Meegalawa          | FMAS_AP4              | <i>borgpetersenii</i> | No agglutination           | 564     | 267          | GTG3   | N/A                                           | 80.6    | 0.00 |
| 14/01/2019       | Galkadawala        | FMAS_AP8              | <i>borgpetersenii</i> | No agglutination           | 791     | 267          | GTG3   | N/A                                           | 80.7    | 0.12 |
| 14/01/2019       | Mihinthale         | FMAS_AP9              | <i>borgpetersenii</i> | No agglutination           | 792     | 267          | GTG3   | N/A                                           | 80.6    | 0.00 |
| 7/6/2018         | Wijebahupura       | FMAS_PN1              | <i>borgpetersenii</i> | No agglutination           | 787     | 267          | GTG3   | LIV                                           | 80.6    | 0.00 |
| 21/12/2018       | <b>Polonnaruwa</b> | FMAS_PN4              | <i>borgpetersenii</i> | No agglutination           | 790     | 267          | GTG3   | N/A                                           | 80.8    | 0.00 |
| 18/11/2017       | Marapana           | FMAS_RT1              | <i>weillii</i>        | No agglutination           | 556     | 262          | GCG2   | N/A                                           | 81.8    | 0.00 |
| 29/12/2017       | Doluwa             | FMAS_PD2              | <i>weillii</i>        | <b>Celledoni</b>           | 559     | 264          | GTG6   | LIV                                           | 82      | 0.00 |
| <b>1966</b>      | <b>Ratnapura</b>   | <b>ALICE CDC</b>      | <i>santarosai</i>     | <b>Autumnalis</b>          | N/A     | N/A          | GCA1*  | N/A                                           | N/A     | N/A  |
